# Supplementary material for: Highly emissive host–guest based on nanoclay intercalated with an Eu3+ complex bearing a new Ru2+ organometallic ligand
Source: Royal Society of Chemistry journal article supplement (doi:10.1039/c8nj02432d), 2018-01-01
Supplement: c8nj02432d1.pdf [file c8nj02432d1.pdf]

## Supporting Information

Highly emissive host-guest based on nanoclay intercalated with an  
 $\text{Eu}^{3+}$  complex bearing a new  $\text{Ru}^{2+}$  organometallic ligand.

Salvador Celedón\*, Andrea S. S. de Camargo, Mauricio Fuentealba,  
Vania Artigas, Eglantina Benavente, Guillermo González\*.

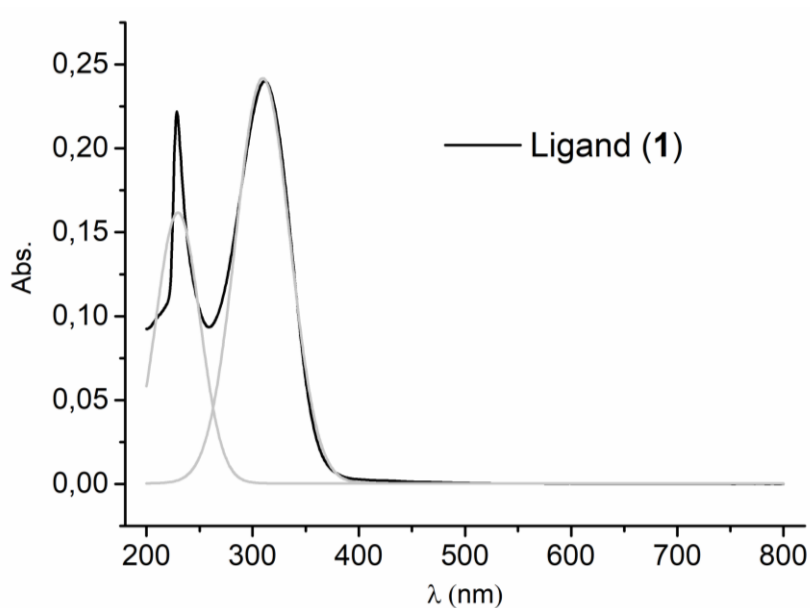

**Figure S1.** Deconvolved absorption UV-vis spectrum in solution of Ligand 1.

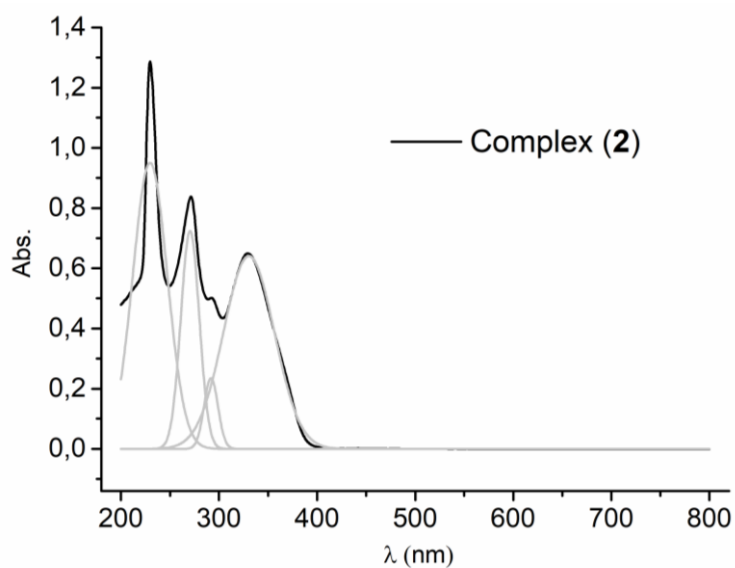

**Figure S2.** Deconvoluted absorption UV-vis spectrum in solution of Complex **2**.

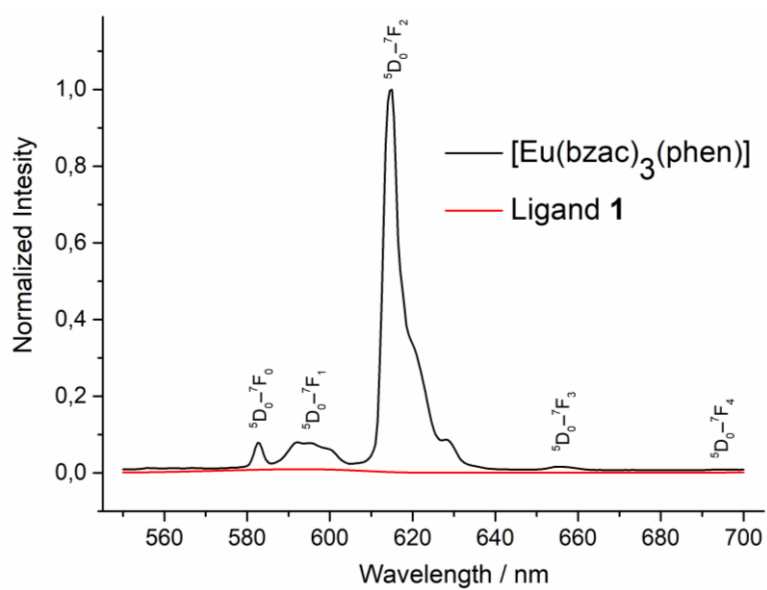

**Figure S3.** Emission spectra in solid state at 77 K. of  $[\text{Eu}(\text{bzac})_3(\text{phen})]$  complex and organometallic ligand **1**.

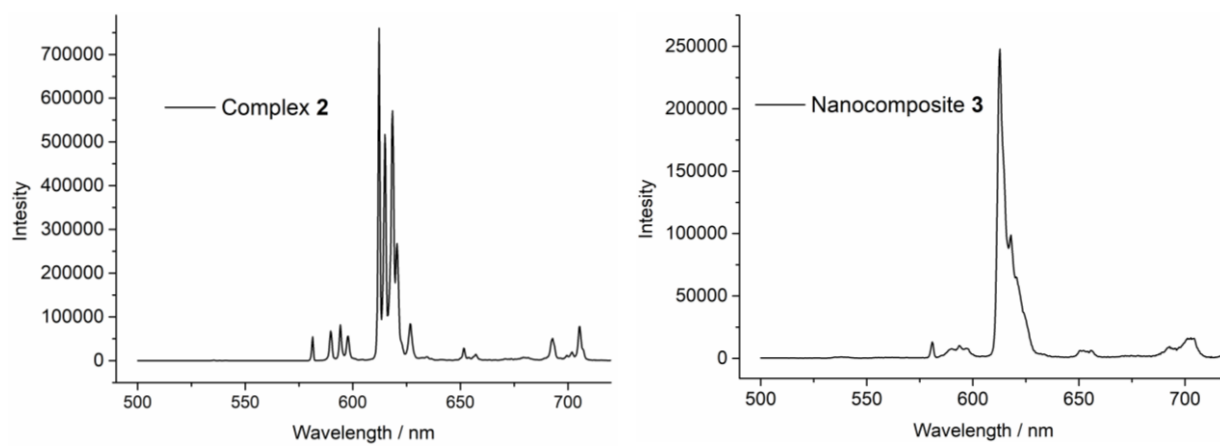

**Figure S4.** Non-normalized emission spectra in solid state at 77 K. of complex **2** (left) and nanocomposite **3** (right).
